# Supplementary material for: The impact of diabetes on the productivity and economy of Bangladesh
Source: PubMed Central journal article supplement — BMJ Glob Health. 2020 Jun 11;5(6):e002420. doi: 10.1136/bmjgh-2020-002420 (PMC7295429; doi:10.1136/bmjgh-2020-002420), 2020-06-11
Supplement: bmjgh-2020-002420supp001.pdf [file bmjgh-2020-002420supp001.pdf]

**Electronic Supplementary Material (ESM)****ESM Table 1: Description and source of data used as inputs for life table models.**

| <b>Model input and description</b>                                                              | <b>Data source</b>                                                                                                                                                                                                                                                                                                                       |
|-------------------------------------------------------------------------------------------------|------------------------------------------------------------------------------------------------------------------------------------------------------------------------------------------------------------------------------------------------------------------------------------------------------------------------------------------|
| <b>Population:</b>                                                                              |                                                                                                                                                                                                                                                                                                                                          |
| The 2017 population of Bangladesh, stratified by gender and 5-year age groups                   | International Diabetes Federation: IDF Diabetes Atlas (8th edition) (1).                                                                                                                                                                                                                                                                 |
| <b>Diabetes Prevalence:</b>                                                                     |                                                                                                                                                                                                                                                                                                                                          |
| Prevalence of T2Dm in Bangladesh in 2017, stratified by gender and 5-year age group             | International Diabetes Federation: IDF Diabetes Atlas (8th edition) (1).                                                                                                                                                                                                                                                                 |
| <b>Mortality rates:</b>                                                                         |                                                                                                                                                                                                                                                                                                                                          |
| Mortality rate in the 2017 population of Bangladesh, stratified by gender and 5-year age groups | IHME-Global Health Data Exchange (GHDx) database (2)                                                                                                                                                                                                                                                                                     |
| Temporal trends in population mortality rate                                                    | Projected average annual proportional reduction in adult mortality in Bangladesh (1.0%) from the United Nations (UN) World Population Prospects (WPP) forecast.(3)                                                                                                                                                                       |
| Relative risk (RR) of all-cause mortality associated with diabetes                              | The Chennai Urban Rural Epidemiology Study (CURES - 150) of adults with diabetes. (4)                                                                                                                                                                                                                                                    |
| <b>Population Labour force participation:</b>                                                   |                                                                                                                                                                                                                                                                                                                                          |
| Labour force participation in Bangladesh in 2017, stratified by gender and 5-year age groups    | International Labour Office: ILO Labour force estimates and projections: 1990-2030.(5)                                                                                                                                                                                                                                                   |
| <b>Diabetes-related productivity losses:</b>                                                    |                                                                                                                                                                                                                                                                                                                                          |
| Productive time loss due to diabetes in 2017, stratified by gender and 5-year age groups        | Primary data collected from a cross-sectional survey among Bangladeshi population with diabetes in 2017.                                                                                                                                                                                                                                 |
| Labour force participation shortfall and absenteeism in those with T2DM                         | Bommer et al. The global economic burden of diabetes in adults aged 20–79 years: a cost-of-illness study. <i>The Lancet Diabetes &amp; Endocrinology</i> 2017;5:423-430.(6)                                                                                                                                                              |
| <b>Gross Domestic Product (GDP):</b>                                                            |                                                                                                                                                                                                                                                                                                                                          |
| The GDP and GDP per equivalent full-time (EFT) Bangladeshi worker in 2017.                      | International Labour Organization, ILOSTAT database. Data retrieved in September 2018. ( <a href="https://data.worldbank.org/indicator/SL.GDP.PCAP.EM.KD?locations=BD&amp;view=chart">https://data.worldbank.org/indicator/SL.GDP.PCAP.EM.KD?locations=BD&amp;view=chart</a> )<br>The World Bank: World Development indicators, 2017.(7) |

---

Temporal trends in GDP growth rate

Organisation for Economic Co-operation and  
Development (OECD) long-term GDP  
forecasts.(8)

---

**ESM Table 2: Annual mortality rate in the total population, those with diabetes and those without diabetes in Bangladesh in 2017 by age group and sex based on the GBD 2017 (1).**

| Age group    | Mortality rate in the total population per person year | Mortality rate among people without diabetes per person year | Mortality rate among people with diabetes per person year |
|--------------|--------------------------------------------------------|--------------------------------------------------------------|-----------------------------------------------------------|
| <b>Men</b>   |                                                        |                                                              |                                                           |
| 20-24        | 0.00074                                                | 0.00067                                                      | 0.00501                                                   |
| 25-29        | 0.00088                                                | 0.00078                                                      | 0.00451                                                   |
| 30-34        | 0.00115                                                | 0.00100                                                      | 0.00468                                                   |
| 35-39        | 0.00142                                                | 0.00123                                                      | 0.00474                                                   |
| 40-44        | 0.00223                                                | 0.00191                                                      | 0.00626                                                   |
| 45-49        | 0.00382                                                | 0.00326                                                      | 0.00925                                                   |
| 50-54        | 0.00679                                                | 0.00583                                                      | 0.01452                                                   |
| 55-59        | 0.01131                                                | 0.00922                                                      | 0.02617                                                   |
| <b>Women</b> |                                                        |                                                              |                                                           |
| 20-24        | 0.00078                                                | 0.00058                                                      | 0.00704                                                   |
| 25-29        | 0.00087                                                | 0.00065                                                      | 0.00599                                                   |
| 30-34        | 0.00087                                                | 0.00064                                                      | 0.00474                                                   |
| 35-39        | 0.00119                                                | 0.00087                                                      | 0.00526                                                   |
| 40-44        | 0.00201                                                | 0.00147                                                      | 0.00750                                                   |
| 45-49        | 0.00253                                                | 0.00187                                                      | 0.00818                                                   |
| 50-54        | 0.00532                                                | 0.00400                                                      | 0.01527                                                   |
| 55-59        | 0.00748                                                | 0.00529                                                      | 0.02315                                                   |

Calculation of annual mortality rates in those with and without diabetes in the Bangladeshi population by age group and sex was based on the following formula:

$$MortNon-diabetes = MortTotal / (DiabetesPrevalence * RR + (1 - DiabetesPrevalence))$$

The mortality rate for those with diabetes were based on the following formula:

$$MortDiabetes = MortNon-diabetes * RR$$

Where:

*MortTotal* = total deaths in population/total population

*MortDiabetes* = mortality rate in those with diabetes

*MortNon-diabetes* = mortality rate in those without diabetes

*RR* = relative rate of all-cause mortality in those with diabetes compared to those without diabetes

Average annual proportional reduction in adult mortality in Bangladesh (1.0% per year) from the United Nations (UN) World Population Prospects (WPP) forecast,<sup>4</sup> was applied progressively across the model time horizon.

**Electronic Supplementary Material references:**

1. International Diabetes Federation. IDF Diabetes Atlas (8th edition). Brussels, Belgium: International Diabetes Federation, 2017.
2. IHME-Global Health Data Exchange (GHDx).
3. United Nations Department of Economic and Social Affairs Population Division. World Population Prospects: The 2017 Revision. 2017.
4. Anjana RM, Unnikrishnan R, Mugilan P, Jagdish PS, Parthasarathy B, Deepa M, et al. Causes and predictors of mortality in Asian Indians with and without diabetes–10 year follow-up of the Chennai Urban Rural Epidemiology Study (CURES-150). *PloS one*. 2018;13(7):e0197376.
5. International Labour Office. ILO Labour force estimates and projections: 1990-2030. Geneva, Switzerland: International Labour Office., 2017.
6. Bommer C, Heesemann E, Sagalova V, Manne-Goehler J, Atun R, Bärnighausen T, et al. The global economic burden of diabetes in adults aged 20–79 years: a cost-of-illness study. *The Lancet Diabetes & Endocrinology*. 2017;5(6):423-30.
7. The World Bank. World Development indicators, 2017. Washington D.C: The World Bank, 2018.
8. Organisation for Economic Co-operation and Development (OECD). OECD Economic Outlook: Statistics and Projections: Long-term baseline projections, Real GDP long-term forecast (indicator). OECD publishing, Paris: 2018.
